# Supplementary material for: Identification of alternative splicing events by RNA sequencing in early growth tomato fruits
Source: PubMed Central journal article supplement (PMC4647595; doi:10.1186/s12864-015-2128-6), 2015-11-16

**A**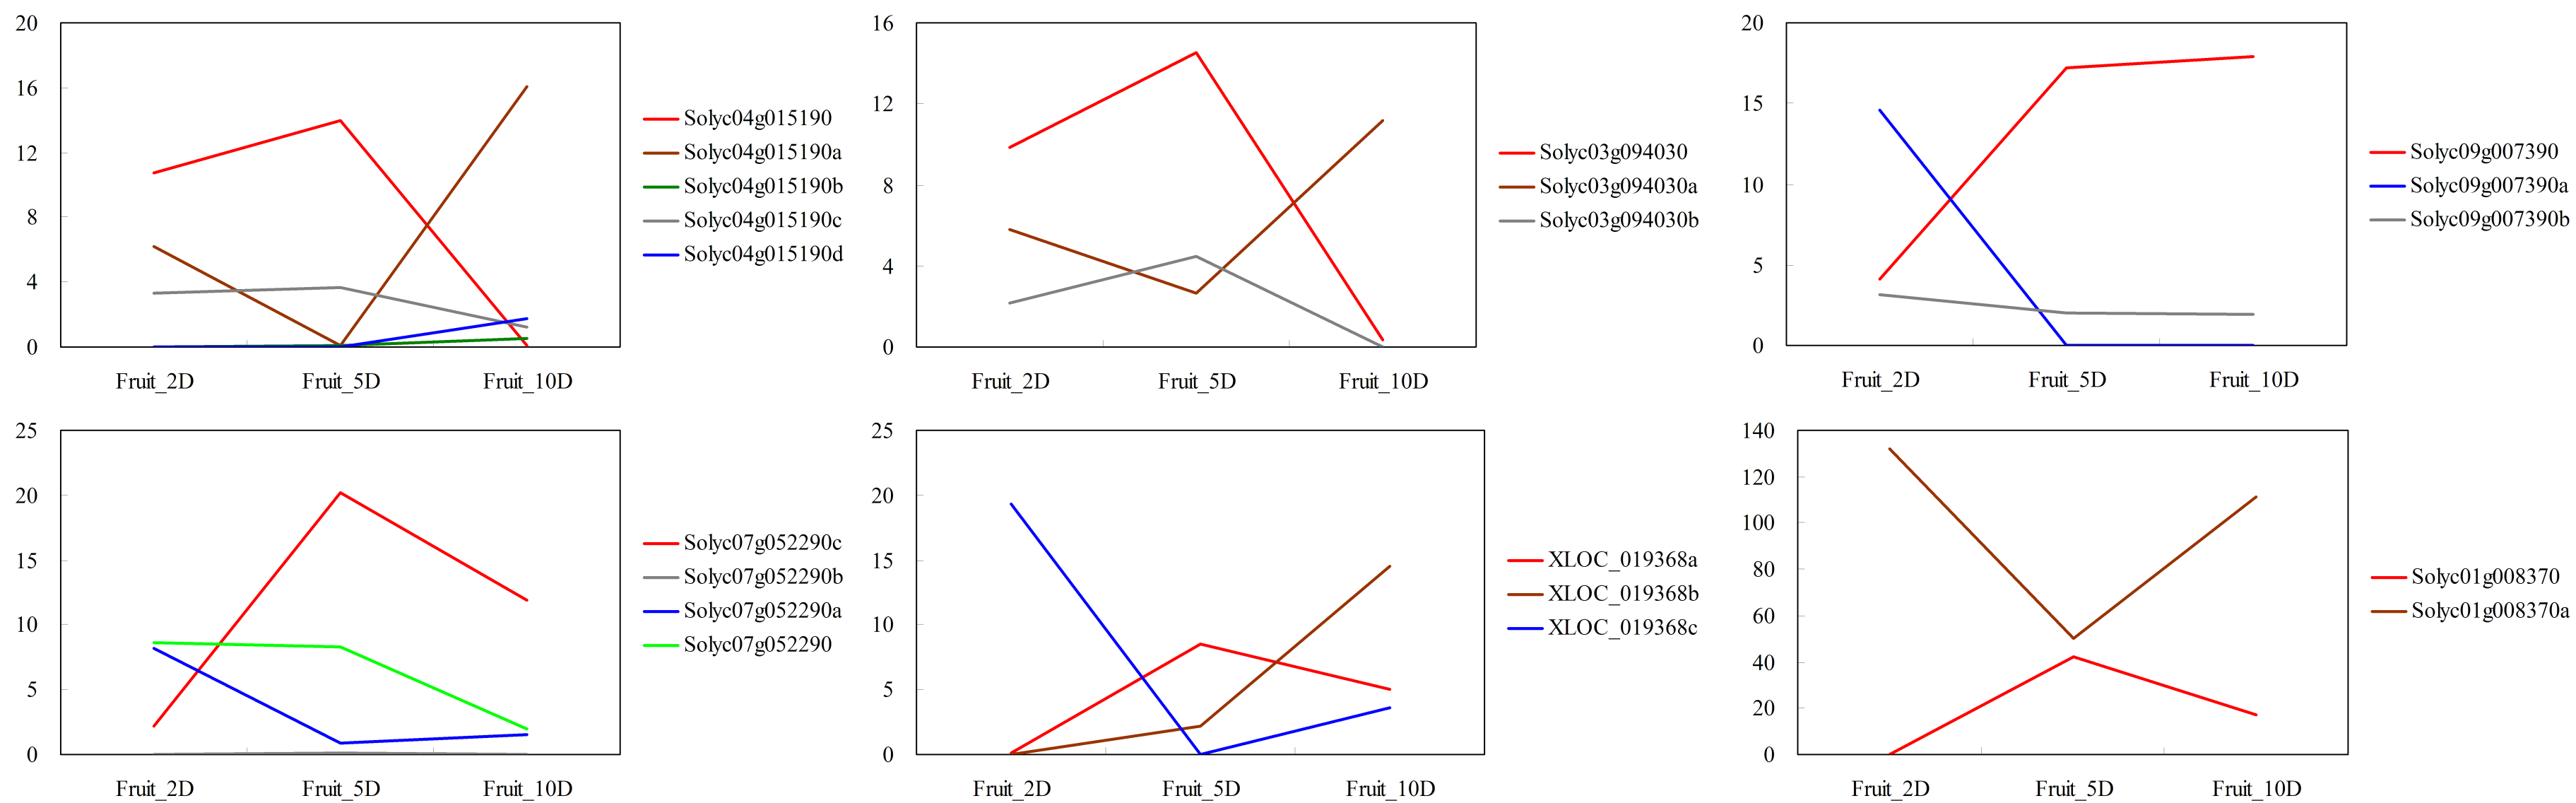**B**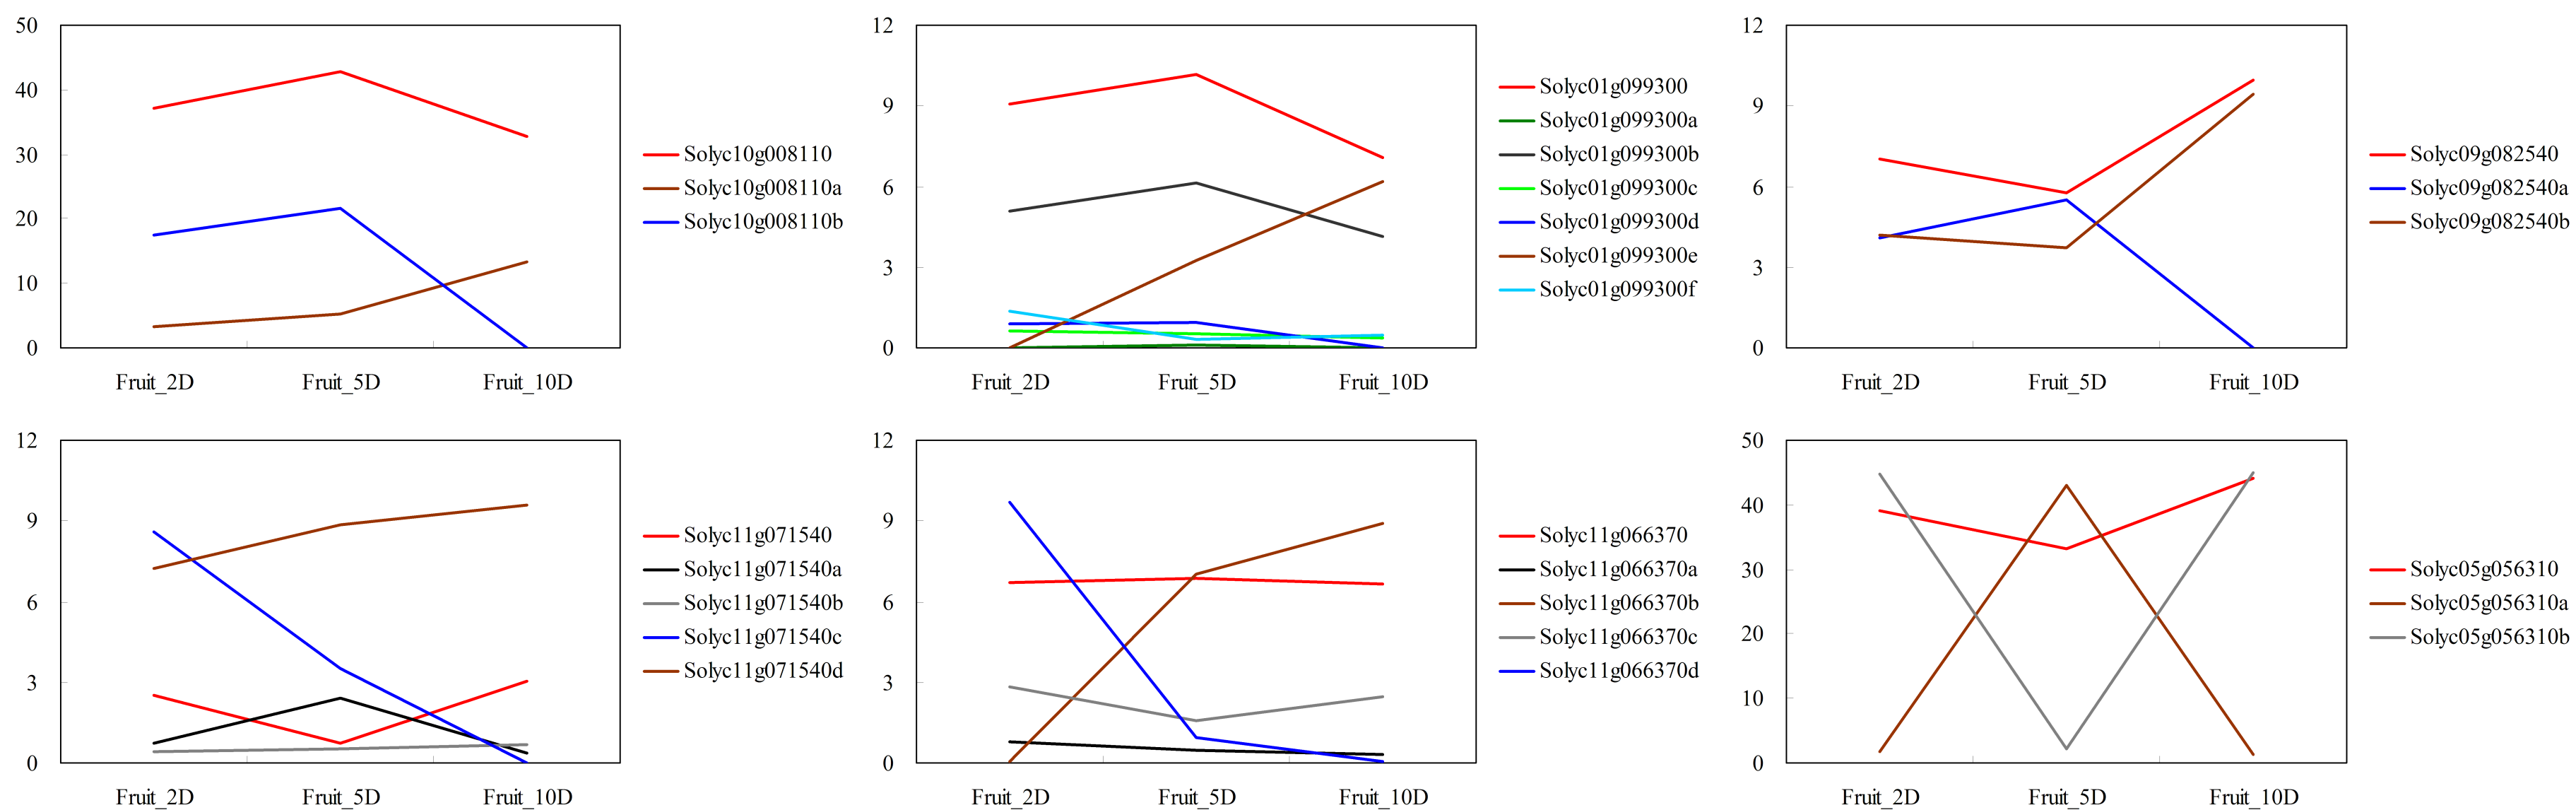**C**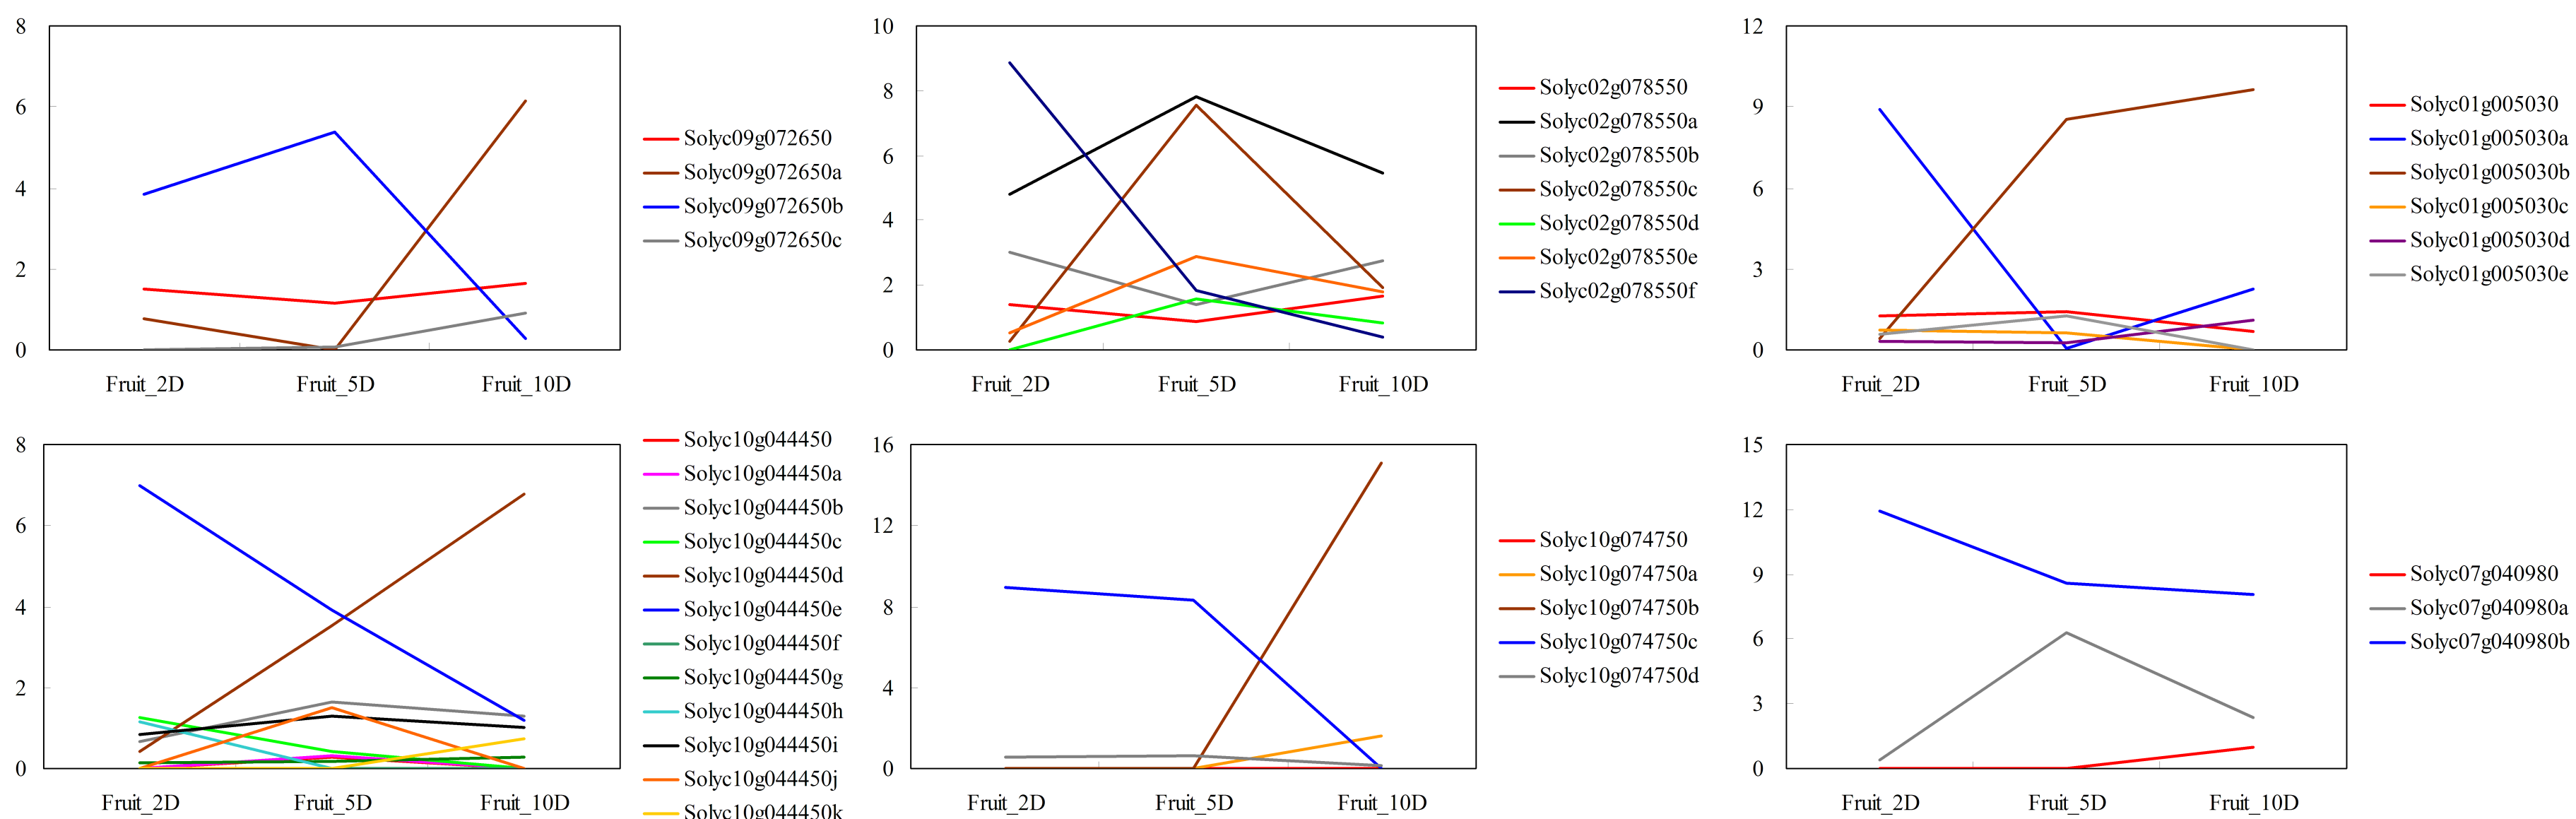

Supplement: 12864_2015_2128_MOESM1_ESM.pdf [file 12864_2015_2128_MOESM1_ESM.pdf]
